# Supplementary material for: Root-Colonizing Endophytic Fungi of the Dominant Grass Stipa krylovii From a Mongolian Steppe Grassland
Source: Front Microbiol. 2019 Nov 12;10:2565. doi: 10.3389/fmicb.2019.02565 (PMC6861457; doi:10.3389/fmicb.2019.02565)
Supplement: TABLE S2 — GenBank accession numbers of sequences used for phylogenetic analyses. [file Table_2.XLSX]

## Sheet: Fig. 4-Pleosporales
Genus	Species	voucher/strain	LSU	TEF	ITS
Acrocalymma	aquatica	MFLUCC:110208	JX276952.1		JX276951
Acrocalymma	vagum	CPC 24222			KP170632
Aigialus	grandis	2Q	GU301794.1	GU349063.1
Aigialus	rhizophorae	BCC 33573	GU479781.1	GU479845.1
Alternaria	alternata	CBS 916.96		KC584634.1	KF465761.1
Alternaria	chlamydosporigena	CBS 125833	MH875261.1		MH863800.1
Alternaria	gansuensis	MQHTC2			KY420919.1
Alternaria	tellustris	CBS 127761	MH876207.1		MH864767.1
Alternaria	tellustris	CBS 538.83	KC584340.1	KC584724.1	NR_135961.1
Aquastroma	magniostiolata	KT 2485	AB807510	AB808486	LC014540
Aquilomyces	rebunensis	KT 732	AB807542	AB808518	AB809630
Ascochyta	pisi	CBS 126.54	MH868800.1		MH857263.1
Bambusicola	bambusae	MFLUCC:110614	JX442035		JX442031.1
Bambusicola	massarinia	MFLUCC:110389	JX442037		JX442033.1
Camposporium	cambrense	CBS 132486	MH877477.1		MH866029.1
Camposporium	ramosum	CBS 132483	MH877478.1		MH866030.1
Chaetosphaeronema	hispidulum	CBS 216.75	KF251652.1	KF253108.1	KF251148.1
Darksidea	alpha	CBS 135650	KP184019	KP184166	KP183998.1
Darksidea	zeta	CBS 135640	KP184013	KP184191	KP183979.1
Dendrophoma	pleurospora	CBS 197.48			MH856307.1
Dictyosporium	strelitziae	CBS 123359	FJ839653		FJ839618.1
Didymella	exigua	CBS 183.55	MH868977.1	KR184187.1	MH857436.1
Didymocrea	sadasivanii	CBS 438.65	DQ384103.1		MH858658.1
Didymosphaeria	variabile	ARSL_071114.4			KX869961.1
Dothidea	hippophaës	CBS 188.58	DQ678048.1	DQ677887.1	MH857750.1
Drechslera	brizae	CBS 190.29	NG_059122.1		NR_153992.1
Falciformispora	tompkinsii	CBS 200.79	KF015625	KF015685	KF015670.1
Flavomyces	fulophazii	CBS 135761	KP184040.1		NR_137960.1
Fusiconidium	indicum	NFCCI 4039	NG_060438.1		NR_154045.1
Fusiconidium	lycopodiellae	CBS 143437	MH107939.1		MH107892.1
Gregarithecium	curvisporum	KT 922	AB807547	AB808523	AB809644
Helicascus	elaterascus	KT2673	AB807533	AB808508	AB809626
Helminthosporium	massarinum	KT 1564	AB807524	AB808500	AB809629
Kalmusia	ebuli	CBS 123120	JN644073		KF796674.1
Katumotoa	bambusicola	KT 1517a	AB524595	AB539108	LC014560
Laburnicola	centaureae	MFLUCC:130601	NG_059664.1	KU743212.1	NR_154131
Laburnicola	dactylidis	MFLUCC:160285	NG_059667.1		KU743203.1
Laburnicola	hawksworthii	MFLUCC:130602	NG_059665.1		NR_154127.1
Laburnicola	muriformis	MFLUCC:160290	NG_059666.1	KU743213.1	NR_154128.1
Latorua	caligans	CBS 576.65	KR873266		KR873232.1
Lentithecium	fluviatile	CBS 122367	GU301825	GU349074
Letendraea	helminthicola	CBS 884.85	AY016362
Lindgomyces	breviappendiculata	HHUF 28193	AB521748.1
Lindgomyces	ingoldianus	ATCC 200398	AB521736.1		NR_119938.1
Lophiostoma	alpigenum	GKM 1091b	GU385193.1	GU327758.1
Lophiostoma	crenatum	AFTOL-ID 1581	DQ678069.1	DQ677912.2
Massarina	eburnea	CBS 473.64	GU301840	GU349040
Melanomma	pulvispyrius	CBS 124080	MH874873.1	GU456265.1	MH863349.1
Melanomma	rhododendri	ANM 73	GU385198.1
Montagnula	aloes	CBS 132531	JX069847		NR_111757.1
Montagnula	spartii	CBS 183.58	GU205225
Morosphaeria	velatispora	BCC 17059	GQ925852
Ophiosphaerella	agrostidis	MFLUCC:110152	KM434281.1	KM434299.1	KM434271.1
Ophiosphaerella	aquatica	MFLUCC:140033	KX767089.1	MG520911.1	NR_154352.1
Ophiosphaerella	herpotricha	26FISCC		KC841093.1	KC841030.1
Ophiosphaerella	herpotricha	35DISCC		KC841096.1	KC841033.1
Ophiosphaerella	korrae	43CISCC		KC841098.1	KC841035.1
Ophiosphaerella	narmari	ATCC 64688		KC848516.1	KC848510.1
Parabambusicola	bambusina	H 4321	AB807536	AB808511	LC014578
Paracamarosporium	fagi	CPC 24890	KR611904.1		NR_154318.1
Paracamarosporium	hawaiiense	CBS 120025	MH874624.1		NR_154287.1
Paracamarosporium	leucadendri	CBS 123027	EU552106
Paraconiothyrium	brasiliense	CBS 100299	MH874305.1		MH862698.1
Paraconiothyrium	brasiliense	CF26			KM979731
Paraconiothyrium	brasiliense	KACC48648			MK396564
Paraconiothyrium	maculicutis	CBS 101461	EU754200
Paraphaeosphaeria	sporulosa	27211			KY114904.1
Paraphoma	chrysanthemicola	BAN100			JN123358
Paraphoma	pye	BRIP 65169		KU999081.1	NR_154344.1
Paraphoma	radicina	CBS 111.79	MH872952.1	KF253130.1	NR_156556.1
Paraphoma	rhaphiolepidis	CBS 142524	KY979813.1	KY979896.1	KY979758.1
Periconia	digitata	CBS 510.77	AB807561	AB808537	LC014584
Periconia	igniaria	CBS 282.67			MH858969.1
Periconia	igniaria	CBS 379.86	AB807566	AB808542	LC014585
Periconia	macrospinosa	REF144	JN859484.1		JN859364.1
Periconia	macrospinosa	REF145			JN859365.1
Periconia	minutissima	MFLUCC:150245	KY794707.1		KY794703.1
Periconia	pseudobyssoides	H 4151	AB807568	AB808544	LC014587
Periconia	pseudodigitata	HHUF 29370	NG_059396.1		NR_153490.1
Phaeosphaeria	caricis	CBS 120249	MH874634.1	GU349005.1	MH863079.1
Phragmocephala	garethjonesii	MFLUCC:150018	NG_059548.1		NR_147636.1
Polyschema	congolensis	CBS 542.73	EF204502		MH860770.1
Preussia	funiculata	CBS 659.74	GU301864.1	GU349032.1
Preussia	minima	CBS 524.50	MH868263.1		MH856741.1
Pseudodictyosporium	elegans	CBS 688.93	DQ018106		NR_137148.1
Pseudotetraploa	curviappendiculata	CBS 125426	MH875148.1		MH863681.1
Pyrenophora	dematioidea	CBS 127923	MH876191.1		MH864751.1
Pyrenophora	leucospermi	CPC 1294	JN712534.1	JN712592.1	JN712468.1
Pyrenophora	nobleae	CBS 259.80			AY004792.1
Pyrenophora	nobleae	JRBP2015.570a			MH399432.1
Pyrenophora	phaeocomes	DAOM 222769	NG_027575.1		JN943649.1
Pyrenophora	triseptata	CBS 128048	MH876234.1		MH864794.1
Spegazzinia	tessarthra	SH 287	AB807584	AB808560
Stagonospora	perfecta	CBS 135099	KF251761	KF253208.1	KF251258.1
Stagonospora	trichophoricola	CBS 136764	KJ869168		NR_156586.1
Stemphylium	vesicarium	CBS 191.86	DQ247804.1	KC584731.1	MH861935.1
Tetraplosphaeria	nagasakiensis	KT 1682	AB524630.1	AB524837.1	AB524806.1
Trematosphaeria	pertusa	KT 1496	AB807585	AB808564	AB809646
Tumularia	aquatica	MUCL 28096			NR_145347.1

## Sheet: Fig. 5-Sordariomycetes
Genus	Species	voucher/strain	LSU	TEF	ITS
Annulatascus	velatisporus	HKUCC 3701	AF132320		AF177150.1
Annulusmagnus	triseptatus	CBS 127687	MH876115.1		MH864679.1
Apiospora	bambusae	ICMP 6889	DQ368630
Apiospora	montagnei	AFTOL-ID 951	DQ471018	DQ842027
Arthrinium	phaeospermum	HKUCC 3395	AY083832
Bambusicularia	brunnea	INA-B-92-45	KM484948		KM484830.1
Bionectria	ochroleuca	AFTOL-ID 187	DQ862027	DQ862029
Botryotinia	fuckeliana	AFTOL-ID 59	AY544651	DQ471045	DQ491491.1
Buergenerula	spartinae	ATCC 22848	DQ341492	JX134692	JX134666.1
Bussabanomyces	longisporus	CBS 125232	KM009154	KM009202.1	KM009166.1
Ceratocystiopsis	minuta	CBS 116963	EU913655		EU913696.1
Claviceps	purpurea	AEG 97 2	AF543789	AF543778
Coniella	wangiensis	CPC 19397	JX069857	KX833705.1	JX069873.1
Cosmospora	coccinea	AR2741	AY489734	AY489629
Cytospora	elaeagni	CFCC 89633	KF765693	KU710919.1	KF765677.1
Cytospora	prunicola	MFLU 17-0995	MG742351.1	MG742354.1	MG742350.1
Diaporthe	eres	AFTOL-ID 935		DQ479931.1	DQ491514.1
Diaporthe	eucalyptorum	CBS 132525	NG_042675.1		NR_120157.1
Diatrype	disciformis	AFTOL D 927	DQ470964	DQ471085
Distoseptispora	aquatica	WHXM 13-1 S-036	KU376268
Dothidea	sambuci	AFTOL-ID 274	AY544681	DQ497606	DQ491505.1
Ellisembia	adscendens	HKUCC 10820	DQ408561
Epichloe	typhina	ATCC 56429		AF543777	JN049832.1
Eutypa	lata	CBS 208.87	MH873755.1		DQ006927.1
Fragosphaeria	purpurea	CBS 133.34	AB189154		AB278192.1
Fusarium	acuminatum	mlt27		MH479902.1	MH470246.1
Fusarium	avenaceum	gss203		MH341236.1	MH290478.1
Fusarium	burgessii	NRRL 66654		MF120517.1	MF120484.1
Fusarium	equiseti	CBS 125834	MH875262
Fusarium	flocciferum	As2		MH456849.1	MH361302.
Fusarium	foetens	CBS 110286	MH874448.1		MH862858.1
Fusarium	graminearum	CBS 134070		MH572253.1
Fusarium	lateritium	SH8KPN			KT963796.1
Fusarium	oxysporum	CBS 131.24	MH866278.1		MH854776.1
Fusarium	redolens	Z318		KP400713.1	KP264660.1
Fusarium	solani	CBS 119600	KM231664.1	KM231926.1	KM231797.1
Fusarium	solani	MB04		LT615299.1	LT615281.1
Fusarium	sporotrichioides	UAMH 5334		DQ676616.1
Fusarium	striatum	CBS 101573	KM231665.1	KM231927.1	KM231798.1
Fusarium	tricinctum	D23-3			KY365572.1
Hydropisphaera	peziza	GJS92 101	AY489730	AY489625
Hypocrea	rufa	DAOM JBT1003	JN938865		JN942883.1
Idriella	lunata	CBS 204.56	NG_058149.1		NR_145249.1
Ijuhya	corynospora	NBRC 31042			LC146752.1
Ijuhya	paraparilis	CBS 127478	MH876037.1		MH864599.1
Ijuhya	peristomialis	CBS 569.76	KY607559.1		KY607544.1
Lecanicillium	antillanum	CBS 350.85	AF339536.1	DQ522350.1	AJ292392.1
Leucostoma	niveum	AFTOL-ID 2125		DQ862035.1
Leucostoma	niveum	AR3413	AF362558	EU222015	JX438624.1
Macgarvieomyces	borealis	CBS 461.65	DQ341511	KM009198.1	KM009162.1
Magnaporthe	salvinii	M21	JF414887	JF710406	JF414838.1
Mazzantia	napelli	AFTOL-ID 2126		DQ862036.1
Mazzantia	napelli	AR3498	AF408368	EU222017
Metarhizium	guizhouense	CBS 258.90	MH873894.1	EU248862.1	MH862211.1
Microdochium	bolleyi	CBS 172.63	MH869857.1		MH858255.1
Microdochium	bolleyi	SMCD 2424			JQ658340.1
Microdochium	chrysanthemoides	LC5466	KU746735.1	KX855236.1	KU746689.1
Microdochium	nivale	CBS 126194	MH877882.1
Microdochium	phragmitis	CBS 423.78	KP858948		KP859012.1
Microdochium	tainanense	CBS 270.76	KP858931		KP858995.1
Microdochium	trichocladiopsis	CBS 623.77	KP858934		KP858998.1
Myrmecridium	banksiae	CBS 132536	MH878335.1		NR_111762.1
Myrmecridium	flexuosum	CBS 398.76	EU041825.1		NR_146238.1
Myrmecridium	iridis	CPC 25084	KR476777.1		NR_156299.1
Myrmecridium	schulzeri	CBS 134.68	EU041827.1		EU041770.1
Myrmecridium	thailandicum	CPC 21694	KF777222.1		NR_137605.1
Nectria	haematococca	GJS89-70	AY489729.1	AY489624.1
Nectria	pseudopeziza	CBS 140160	KU593583.1		KU593584.1
Nectriopsis	violacea	CBS 849.70	MH871773.1		MH859978.1
Neonectria	ramulariae	CBS 151.29	HM042436	HM054091.1	JF735313.1
Niesslia	exilis	CBS 560.74	AY489720	AY489614
Ophioceras	commune	M92	JX134688	JX134702.1	JX134676.1
Ophioceras	dolichostomum	CBS 114926	JX134689	JX134703	JX134677.1
Ophioceras	leptosporum	CBS 894.70	JX134690	JX134704.1	JX134678.1
Ophiodiaporthe	cyatheae	YMJ 1364	JX570891	JX570892.1	JX570889.1
Ophiostoma	piliferum	AFTOL-ID 910	DQ470955	DQ471074
Paecilomyces	lilacinus	MY683		GU979977.1	GU980015.1
Peethambara	spirostriata	CBS 110115	AY489724	AY489619
Phaeocytostroma	ambiguum	CBS 128561	MH876462.1		MH865025.1
Phaeocytostroma	plurivorum	CBS 113835	JX681106.1	FR748078.1	MH862945.1
Pleurophragmium	acutum	CBS 129113	MH876650.1		MH865210.1
Pochonia	chlamydosporia	CBS 101244	DQ518758.1	DQ522327.1	JN049821.1
Pseudohalonectria	fagicola	MFLU 16-1085	KX426219	KX426226
Pseudohalonectria	hampshirensis	MFLU 16-1086	KX426218	KX426224
Pseudohalonectria	lignicola	M95	JX134691	JX134705	JX134679.1
Pseudohalonectria	lutea	CBS 126574	JX066706		MH864160.1
Pseudophialophora	eragrostis	CM20m5-2	KF689637.1	KF689627.1	KF689647.1
Pseudophialophora	magnispora	CM14RG50-1	KP769828.1	KP784827.1	KP769836.1
Pseudophialophora	magnispora	RUTPP CM14RG38			NR_158900.1
Pseudophialophora	schizachyrii	AL2m1	KF689639.1	KF689629.1	KF689649.1
Pseudophialophora	schizachyrii	RUTPP AL3s4	NG_060118.1		NR_158894.1
Pseudophialophora	whartonensis	WSF14RG66-1	KP769826.1	KP784825.1	KP769834.1
Pseudoproboscispora	caudae-suis	A336-2D	AY094192		KU975068.1
Pseudopyricularia	kyllingae	HYKB202-1-2	KM484992		KM484876.1
Raffaelea	canadensis	CBS 168.66	EU177458		GQ225699.1
Roumegueriella	rufula	GJS 91 164	EF469082	EF469070
Schizoparme	straminea	CBS 149.22	AF362569
Selenodriella	cubensis	CBS 683.96	KP858990		KP859053.1
Selenodriella	fertilis	CBS 772.83	KP858992		KP859055.1
Shimizuomyces	paradoxus	EFCC 6279	EF469084.1	EF469071.1	JN049847.1
Slopeiomyces	cylindrosporus	CBS 609.75	KM485040		KM484945.1
Sphaerostilbella	berkeleyanan	CBS 102308	U00756	AF543783
Stachybotrys	chlorohalonata	UAMH6417	AY489712	AY489607	AF206273.1
Stegonsporium	protopyriforme	CBS 117041	EU039991	EU040017	EU039976.1
Stephanonectria	keithii	GJS92 133	AY489727	AY489622
Stilbella	byssiseda	CBS 828.70	MH871765.1		MH859966.1
Stilbospora	longicornuta	CBS 122529	KF570164	KF570232	KF570164.1
Submersisphaeria	aquatica	A95-1B	AY094193		KU975067.1
Tolypocladium	paradoxum	NBRC 106958	JN941411.1	AB968600.1	JN943324.1
Trichoderma	reesei	ATCC 26921	KU729112.1	KU933433.1	KU729028.1
Utrechtiana	cibiessia	CPC 18916	JF951176		JF951153.1
Valsa	ambiens	AFTOL-ID 2131		DQ862041.1
Valsa	ambiens	AR3516	EU255208	EU222019
Valsella	salicis	AR 3514	EU255210	EU222018
Viridispora	diparietispora	ATCC MYA 627	AY489735	AY489630

## Sheet: Fig. 6-Darksidea
Genus	Species	voucher/strain	LSU	TEF	ITS
Darksidea	alpha	CBS 135628	KP184035.1	KP184161.1	KP183965.1
Darksidea	alpha	CBS 135630	KP184032.1	KP184162.1	KP183987.1
Darksidea	alpha	CBS 135631	KP184033.1	KP184180.1	KP183968.1
Darksidea	alpha	CBS 135632	KP184034.1	KP184181.1	KP183969.1
Darksidea	alpha	CBS 135642	KP184026.1	KP184182.1	KP183967.1
Darksidea	alpha	CBS 135646	KP184015.1	KP184164.1	KP183994.1
Darksidea	alpha	CBS 135650	KP184019.1	KP184166.1	KP183998.1
Darksidea	alpha	CBS 135654	KP184010.1	KP184176.1	KP183972.1
Darksidea	alpha	CBS 135656	KP184007.1	KP184178.1	KP183971.1
Darksidea	beta	CBS 135636	KP184008.1		KP183976.1
Darksidea	beta	CBS 135637	KP184023.1	KP184189.1	KP183978.1
Darksidea	beta	CBS 135657	KP184009.1	KP184190.1	KP183977.1
Darksidea	delta	CBS 135629	KP184006.1	KP184183.1	KP183980.1
Darksidea	delta	CBS 135638	KP184024.1	KP184184.1	KP183981.1
Darksidea	delta	CBS 135639	KP184027.1	KP184185.1	KP183982.1
Darksidea	epsilon	CBS 135658	KP184029.1	KP184186.1	KP183983.1
Darksidea	gamma	CBS 135633	KP184031.1	KP184187.1	KP183984.1
Darksidea	gamma	CBS 135634	KP184028.1	KP184188.1	KP183985.1
Darksidea	gamma	CBS 135635			KP183986.1
Darksidea	zeta	CBS 135640	KP184013.1	KP184191.1	KP183979.1
Lentithecium	clioninum	KT1149a	AB807540.1	AB808515.1	LC014566.1

## Sheet: Fig. 7-Basidiomycota
Genus	Species	voucher/strain	LSU	TEF	SSU	ITS
Armillaria	gemina	ST9		JF313135.1
Athelia	rolfsii	S-38		KU937340.1
Cantharocybe	gruberi	AFTOL-ID 1017	DQ234540.1	DQ059045.1	DQ234546.1	DQ200927.1
Clitocybe	ulmicola	TENN029208	NG_058814.1			NR_119887.1
Clitocybula	atroalba	AFTOL-ID 1529	DQ457659.1		DQ437682.1	DQ192179.1
Cyphellopsis	anomala	TL2015-719433				KX772747.1
Daedaleopsis	confragosa	Dc8		HG973509.1
Flammulina	velutipes	AFTOL-ID 558	AY639883.1	AY883423.1	AY665781.1	AY854073.1
Fomitiporia	dryophila	MUCL 46380	EF429219.1	GU461900.1
Galerina	marginata	AFTOL-ID 465	DQ457669.1		DQ440635.1	DQ192182.1
Guepiniopsis	buccina	AFTOL-ID 888	AY745711.1	DQ028588.1	DQ667157.1	DQ206986.1
Hydnochaete	duportii	AFTOL-ID 666	AY635770.1	DQ435793.1	AY662669.1	DQ404386.1
Hymenagaricus	taiwanensis	AFTOL-ID 1383	DQ457680.1		DQ089016.1	DQ490633.1
Hymenochaete	acerosa	BJFCHe344	JQ279657.1			NR_120042.1
Hymenochaete	cinnamomea	He755	JQ279658.1
Hymenochaete	fuliginosa	He785				JQ279545.1
Hymenochaete	muroiana	He4044	KY425684.1			KY425676.1
Hymenochaete	nanospora	CBS 924.96	NG_057683.1			NR_160200.1
Lachnella	alboviolascens	MO315410				MH558281.1
Lachnella	villosa	AFTOL-ID 525	DQ097347.1	GU187721.1	AY705959.1	DQ097362.1
Maireina	filipendula	CTL14226				NR_160459.1
Marasmius	oreades	AFTOL-ID 1559			DQ457644.1	DQ490641.1
Marasmius	palmivorus	OP4	JQ654221.1			JQ653424.1
Marasmius	palmivorus	SCHD6	KX290488.1			KX290489.1
Marasmius	rotula	AFTOL-ID 1505	DQ457686.1	GU187723.1	DQ113912.2	DQ182506.1
Megacollybia	platyphylla	AFTOL-ID 560	AY635778.1	DQ435786.1	AY786053.1	DQ249275.1
Moniliophthora	perniciosa	CBS 193.77	MH872817.1			MH861049.1
Moniliophthora	perniciosa	DIS71	AY916738.1	AY916741.1	AY916739.1
Moniliophthora	roreri	B4	JX515298.1			JX515291.1
Moniliophthora	roreri	C21	AY916744.1	AY916748.1	AY916745.1	AY916746.1
Mycetinis	alliaceus	AFTOL-ID 556	AY635776.1	AY883431.1	AY787214.1	AY854076.1
Peniophorella	guttuliferum	CBS 107303	LT603001.1	LT603027.1	LT603000.1	LT603016.1
Phellinus	ellipsoideus	MUCL 47820	KU954542.1	KU936787.1
Porotheleum	fimbriatum	AFTOL-ID 1725	DQ457673.1		DQ444854.1	DQ490626.1
Schizophyllum	commune	CBS 476.64		LT217596.1
Schizophyllum	umbrinum	MUCL 43017	LT217594.1	LT217628.1		LT217560.1
Sistotrema	oblongisporum	AFTOL-ID 617	AY647210.1		AY757263.1
Skeletocutis	vulgaris	CBS 465.50				MH856711.1
Trametes	versicolor	AFTOL-ID 768	AY684159.1	DQ028603.1	AY705965.1
